# Supplementary material
Source: PubMed Central journal article supplement (PMC6054443)
Supplement: DBi180002SupplementaryData.pdf [file DBi180002SupplementaryData.pdf]

SUPPLEMENTARY DATA

**Supplementary Table 1.** HLA typing

| Patient | A*         | A*         | DRB1*         | DRB1*           | DQB1*       | DQB1*          |
|---------|------------|------------|---------------|-----------------|-------------|----------------|
| 1       | 02:01 (A2) | 23         | 04:01 (DR4)   | 11:01 (DR11)    |             |                |
| 2       | 30         | 33         | 03:01 (DR17)  | 07:01 (DR7)     | 02:01 (DQ2) | 02:02 (DQ2)    |
| 3       | 02:01 (A2) |            | 04:01 (DR4)   |                 |             |                |
| 4       |            |            | 04:01 (DR4)   |                 |             |                |
| 5       |            |            |               |                 |             |                |
| 6       | 02:01 (A2) | 24         | 04:04 (DR4)   | 11:04 (DR11)    | 03:01 (DQ7) | 03:02 (DQ8)    |
| 7       | 3          | 3          | 04:04 (DR4)   | 13:02 (DR13)    | 03:02 (DQ8) | 06:09 (DQ6)    |
| 8       | 02:01 (A2) |            | 04:01 (DR4)   |                 |             |                |
| 9       | 1          | 1          | 03:01 (DR17)  | 04:01 (DR4)     | 02:01 (DQ2) | 03:02 (DQ8)    |
| 10      | 02:01 (A2) | 68         | 03:01 (DR17)  | 11:04 (DR11)    | 02:01 (DQ2) | 03:01 (DQ7)    |
| 11      | 02:01 (A2) | 68         | 07:01 (DR7)   | 11:01 (DR11)    | 02:02 (DQ2) | 03:01 (DQ7)    |
| 12      | 02:01 (A2) | 29         | 04:01 (DR4)   | 13:02 (DR13)    | 03:01 (DQ7) | 06:04 (DQ6)    |
| 13      | A2-        |            |               |                 |             |                |
| 14      | 02:01 (A2) |            | 04:01 (DR4)   |                 |             |                |
| 15      | 03         | 24         | 04:01 (DR4)   | 07:01 (DR7)     | 02:01 (DQ2) | 03:01 (DQ7)    |
| 16      |            |            |               |                 |             |                |
| 17      | 02:01 (A2) | 03         | 01:03 (DR103) | 04:01 (DR4)     | 03:01 (DQ7) | 03:01 (DQ7)    |
| 18      | 24         | 30         | 04:05 (DR4)   | 14:06 (DR 14)   | 02:02 (DQ2) | 03:01 (DQ7)    |
| 19      |            |            |               |                 |             |                |
| 20      | 3          | 11         | 04:04 (DR4)   | 04:04 (DR4)     | 03:02 (DQ8) | 03:02 (DQ8)    |
| 21      | 1          | 1          | 03:01 (DR17)  | 03:01 (DR17)    | 02:01 (DQ2) | 02:01 (DQ2)    |
| 22      | 11         | 11         | 04:05 (DR4)   | 12:02 (DR 12)   | 03:01 (DQ7) | 04:01 (DQ4)    |
| 23      |            |            |               |                 |             |                |
| 24      | 02:01 (A2) | 1          | 03:01 (DR17)  | 11:01 (DR11)    | 02:01 (DQ2) | 03:01 (DQ7)    |
| 25      | 02:01 (A2) | 1632:00:00 | 03:01 (DR17)  | 04:01 (DR4)     | 02:01 (DQ2) | 03:02 (DQ8)    |
| 26      | 02:01 (A2) |            |               |                 |             |                |
| 27      | 02:01 (A2) | 03         | 04:02 (DR4)   | 11:02/03 (DR11) | 03:02 (DQ8) | 03:01/19 (DQ7) |
